# Supplementary material
Source: Springer Nature journal article supplement (https://www.springermedizin.de/resource/supplementary/12936_2012_2700_MOESM1_ESM.pdf/9545148)
Supplement: MOESM1 [file 9545148]

Community Priorities  
(N<sup>o</sup> of focus groups theme mentioned)

Stock outs (5)

Transportation  
difficulties

- Inadequate vehicles (6)
- Poor roads/rainy season (6)

Community control

- Healers (3)
- Prevention (5)

Health  
infrastructure

- Lack personnel (1)
- Too expensive (1)
